# Supplementary material for: Computational modeling of ventricular-ventricular interactions suggest a role in clinical conditions involving heart failure
Source: Frontiers journal article supplement (doi:10.3389/fphys.2023.1231688), 2023-09-06
Supplement: Data_Sheet_1.pdf [file Data_Sheet_1.pdf]

**Supplemental Material to Computational Modeling of Ventricular-  
Ventricular Interactions Suggest a Role in Clinical Conditions  
Involving Heart Failure**

Healthy and dysfunction cases were simulated for different heart rates: 60, 80, and 100 bpm. The cardiac power output at full compensation (i.e., performed at a mean systemic arterial pressure of ~95 mmHg) is shown in **Figure S1**. If full compensation was not achieved, it was excluded from the plots. Values are shown in **Table S1**.

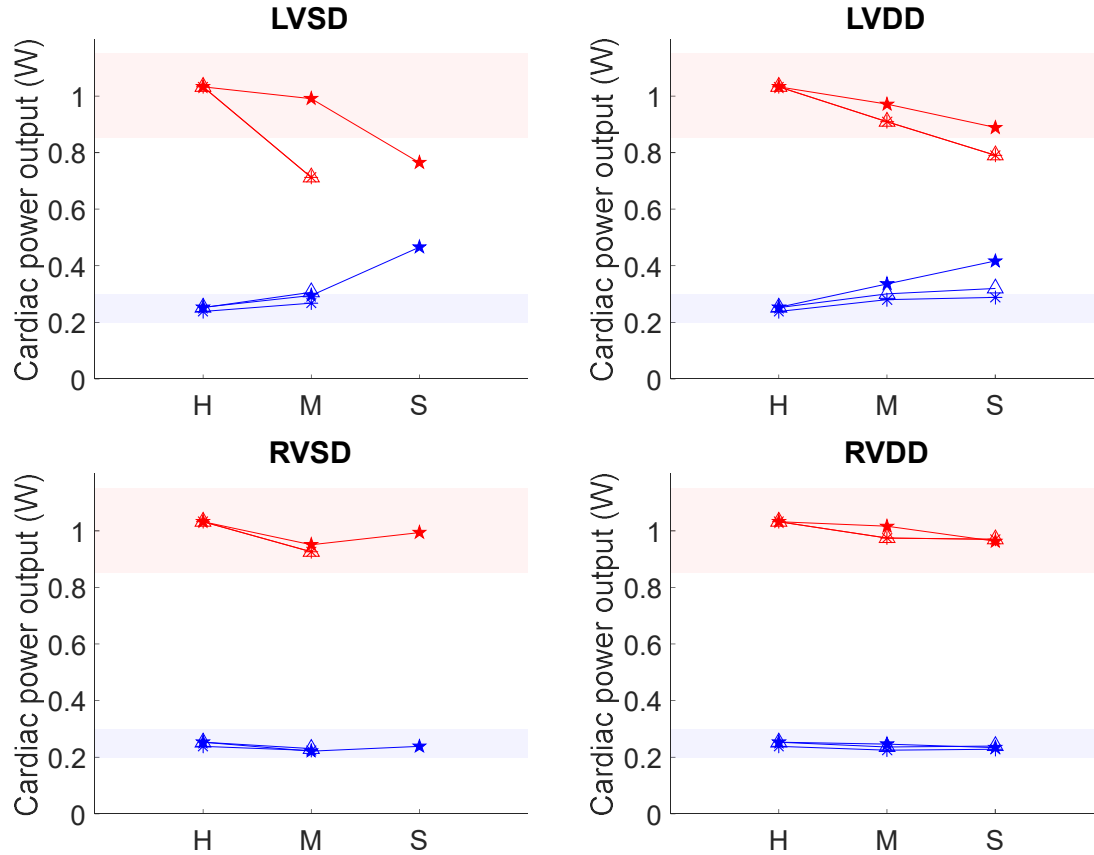

**Figure S1:** Cardiac power output for the left (LV, red) and right (RV, blue) ventricles for heart rates at 60 (star), 80 (triangle), and 100 (asterisk) bpm. SD – systolic dysfunction. DD – diastolic dysfunction.

**Table S1:** Cardiac power output (W) at several heart rates.

|         | HR = 60 |      | HR = 80 |      | HR = 100 |      |
|---------|---------|------|---------|------|----------|------|
|         | LV      | RV   | LV      | RV   | LV       | RV   |
| Healthy | 1.04    | 0.25 | 1.03    | 0.25 | 0.98     | 0.24 |
| LVSD, M | 0.99    | 0.30 | 0.71    | 0.31 | 0.61     | 0.27 |
| LVSD, S | 0.76    | 0.47 | -       | -    | -        | -    |
| LVDD, M | 0.97    | 0.34 | 0.91    | 0.30 | 0.87     | 0.28 |
| LVDD, S | 0.89    | 0.42 | 0.79    | 0.32 | 0.75     | 0.29 |
| RVSD, M | 0.95    | 0.22 | 0.93    | 0.23 | 0.89     | 0.22 |
| RVSD, S | 0.99    | 0.24 | -       | -    | -        | -    |
| RVDD, M | 1.02    | 0.25 | 0.97    | 0.24 | 0.93     | 0.22 |
| RVDD, S | 0.96    | 0.23 | 0.97    | 0.24 | 0.93     | 0.23 |

LV – Left ventricle. RV – Right ventricle. SD – Systolic dysfunction. DD – Diastolic Dysfunction.
